# Supplementary material for: Temperature-dependent differential capacitance of an ionic liquid-graphene-based supercapacitor
Source: Royal Society of Chemistry journal article supplement (doi:10.1039/d3cp05039d), 2024-01-01
Supplement: d3cp05039d1.pdf [file d3cp05039d1.pdf]

## Supplementary Information

### ”Temperature-dependent differential capacitance of an ionic liquid-graphene-based supercapacitor”

Kiran Prakash,\* and Sarith P. Sathian\*

*\*Department of Applied Mechanics and Biomedical Engineering,  
Indian Institute of Technology Madras,  
Chennai-600036, Tamil Nadu, India.*

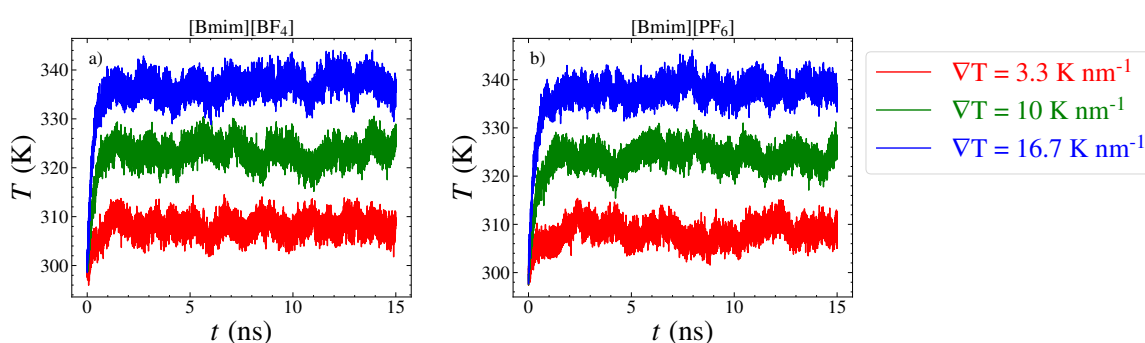

**Figure S1:** Average temperature evolution of the ionic liquid; a) [Bmim][BF<sub>4</sub>], b) [Bmim][PF<sub>6</sub>] for different  $\nabla T$ .

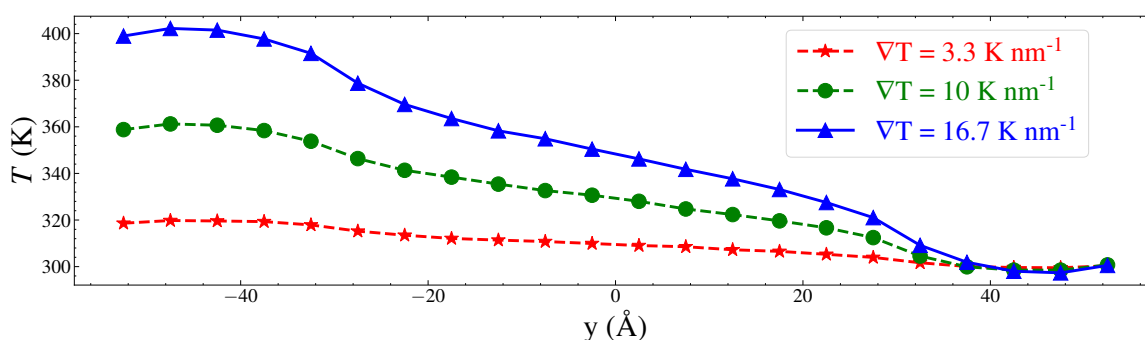

**Figure S2:** The temperature of the graphene electrode measured along its length (y-direction).
